# Supplementary figures and images for: Effect of Fluconazole Coadministration and CYP2C9 Genetic Polymorphism on Siponimod Pharmacokinetics in Healthy Subjects
Source: Springer Nature journal article supplement (doi:10.1007/s40262-018-0700-3), 2018-08-07

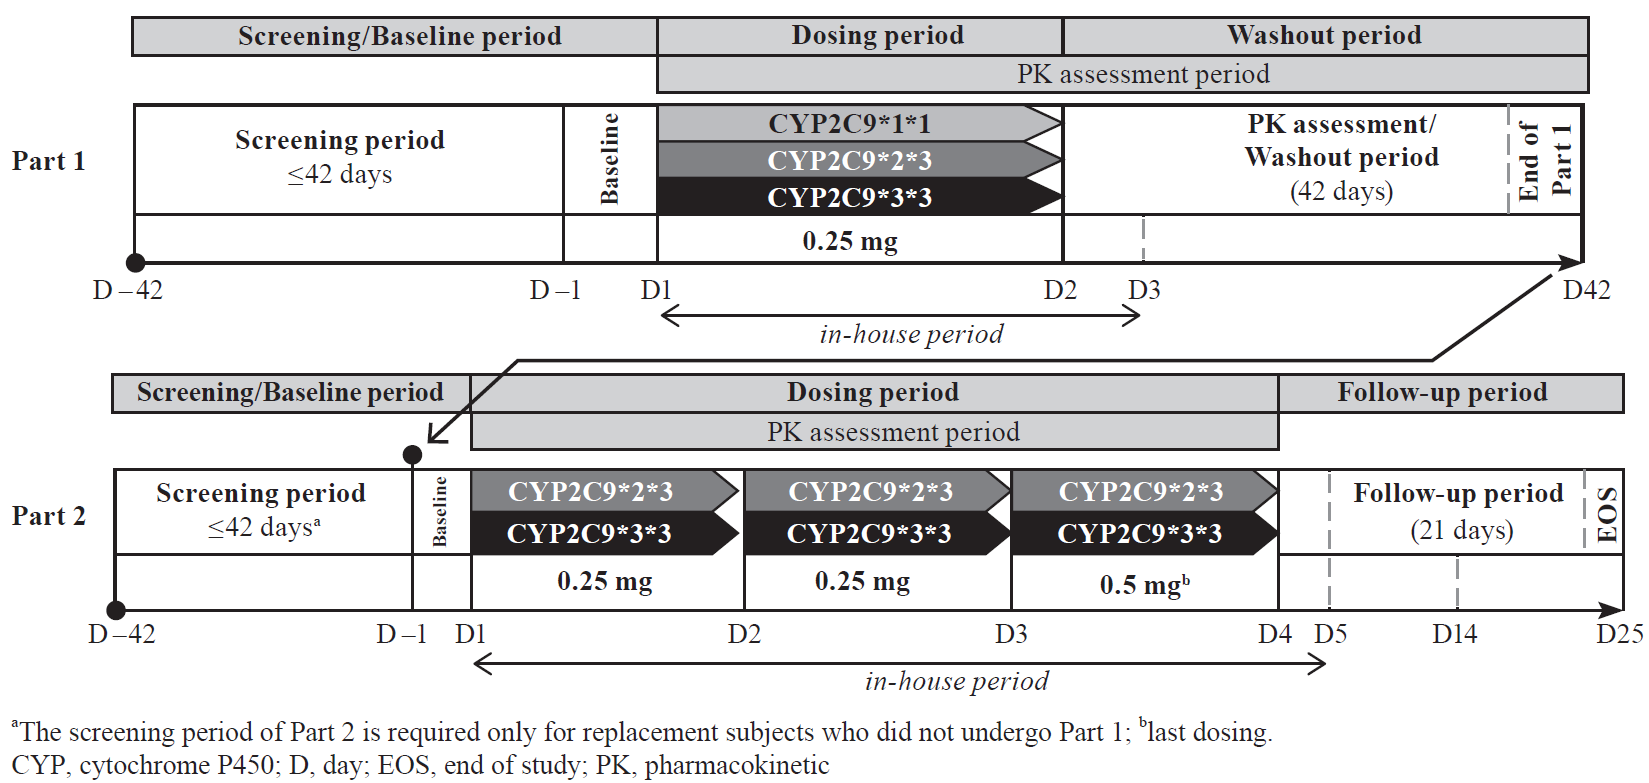


**Fig. S2** Study design

Supplement: MOESM3 [file 16017306]
